# Supplementary material
Source: ML conference proceedings conference paper supplement (https://openaccess.thecvf.com/content/ICCV2023/html/Liang_Inducing_Neural_Collapse_ICCV_2023_paper.html)
Supplement: Supplementary file 1 [file Liang_Inducing_Neural_Collapse_ICCV_2023_supplemental.zip]

# Supplementary: Inducing Neural Collapse to a Fixed Hierarchy-Aware Frame for Reducing Mistake Severity

Anonymous ICCV submission

Paper ID 10135

## 1. Prove the proposed hierarchy-aware frame satisfies the frame condition

First, we give the definition of the frame condition in Euclidean space:

**Definition 1** (Frame). A set of vectors  $\{\varphi_k\}_{k=1}^M$  in  $\mathbb{R}^N$  is called a frame for  $\mathbb{R}^N$ , if there exist constants  $0 < A \leq B < \infty$  such that

$$A\|x\|^2 \leq \sum_{k=1}^M |\langle x, \varphi_k \rangle|^2 \leq B\|x\|^2, \forall x \in \mathbb{R}^N \quad (1)$$

where  $\langle \cdot, \cdot \rangle$  and  $\|\cdot\|$  denote the dot product on  $\mathbb{R}^N$  and its corresponding norm.

Then we repeat the definition of our Hierarchy-Aware Frame (HAFRAME):

**Definition 2** (Hierarchy-Aware Frame). Let a set of vectors  $\{w_i\}_{i=1}^K$  in  $\mathbb{R}^K$  with  $\|w_i\|_2 = 1$ , for  $i = 1, \dots, K$ , and their pair-wise cosine similarities satisfy the following equation:

$$\cos \angle(w_i, w_j) = w_i^T w_j = S_{ij}, \forall 1 \leq i \leq j \leq K \quad (2)$$

where  $S_{ij}$  is the cosine similarity between classes  $i$  and  $j$  given by our exponential mapping function. Next, let  $W = [w_1 \ w_2 \ \dots \ w_K]$  be the proposed hierarchy-aware frame,  $W$  is in  $\mathbb{R}^{K \times K}$  and satisfies

$$S = W^T W \quad (3)$$

Since  $S$  is guaranteed to be positive definite by our search for the proper  $s_{min}$  in the mapping function, we can construct  $W$  with the following matrix factorization:

$$S = QDQ^T = (QD^{\frac{1}{2}}U^T)(UD^{\frac{1}{2}}Q^T) = W^T W \quad (4)$$

where  $Q \in \mathbb{R}^{K \times K}$  and  $D \in \mathbb{R}^{K \times K}$  are acquired from eigenvalue decomposition of  $S$ , and  $U \in \mathbb{R}^{K \times K}$  is an orthonormal matrix obtained from QR-decomposition [2] of a random matrix in  $\mathbb{R}^{K \times K}$  that allows an arbitrary rotation

and satisfies  $U^T U = U U^T = I_K$ . Therefore, the proposed hierarchy-aware frame is given by:

$$W = U D^{\frac{1}{2}} Q^T \quad (5)$$

**Theorem 1.** The proposed HAFRAME  $W$  satisfies the frame condition (Eqn. 1) if the associated cosine similarity matrix  $S$  is positive definite.

*Proof.* To prove the proposed HAFRAME  $W$  satisfies the frame condition [1] given in Eqn. 1, we substitute the set of vectors  $\{\varphi_k\}_{k=1}^M$  in the Eqn. 1 with the set of vectors  $\{w_i\}_{i=1}^K$  consisting the HAFRAME  $W$ . It's equivalent to proving the following condition is satisfied when  $S$  is positive definite:

$$A\|x\|^2 \leq \sum_{i=1}^K |\langle x, w_i \rangle|^2 \leq B\|x\|^2, \forall x \in \mathbb{R}^K \quad (6)$$

Therefore, we need to prove the following:

$$Ax^T x \leq \sum_{i=1}^K (x^T w_i)(w_i^T x) \leq Bx^T x \quad (7)$$

Since  $W = [w_1 \ w_2 \ \dots \ w_K]$ , we can further write  $\sum_{i=1}^K (x^T w_i)(w_i^T x)$  as:

$$\sum_{i=1}^K (x^T w_i)(w_i^T x) = x^T \begin{bmatrix} w_1 & w_2 & \dots & w_K \end{bmatrix} \begin{bmatrix} w_1^T \\ w_2^T \\ \vdots \\ w_K^T \end{bmatrix} x \quad (8)$$

Therefore, we have:

$$\sum_{i=1}^K (x^T w_i)(w_i^T x) = (x^T W)(W^T x) = x^T W W^T x \quad (9)$$

Combining inequalities in Eqn. 7 and Eqn. 9, we have:

$$Ax^T x \leq x^T W W^T x \leq Bx^T x \quad (10)$$

If  $\|\mathbf{x}\| = 0$ , the *frame condition* in Eqn. 6 is met. Otherwise, we have:

$$A \leq \frac{\mathbf{x}^T \mathbf{W} \mathbf{W}^T \mathbf{x}}{\mathbf{x}^T \mathbf{x}} \leq B \quad (11)$$

where  $\frac{\mathbf{x}^T \mathbf{W} \mathbf{W}^T \mathbf{x}}{\mathbf{x}^T \mathbf{x}}$  is the Rayleigh quotient  $R(\mathbf{W} \mathbf{W}^T, \mathbf{x})$  [3] for a real symmetric matrix  $\mathbf{W} \mathbf{W}^T$ , and it is bounded by the minimum and maximum eigenvalues of  $\mathbf{W} \mathbf{W}^T$ . Therefore, we have:

$$\lambda_{min} \leq \frac{\mathbf{x}^T \mathbf{W} \mathbf{W}^T \mathbf{x}}{\mathbf{x}^T \mathbf{x}} \leq \lambda_{max} \quad (12)$$

where  $\lambda_{min}$  and  $\lambda_{max}$  are the minimum and maximum eigenvalues of  $\mathbf{W} \mathbf{W}^T$ . Hence, we only need to prove that  $\mathbf{W} \mathbf{W}^T$  is a positive definite matrix when  $\mathbf{S}$  is positive definite, i.e., for any  $\mathbf{x} \neq 0$ , we need to prove:

$$\mathbf{x}^T \mathbf{W} \mathbf{W}^T \mathbf{x} = (\mathbf{W}^T \mathbf{x})^T (\mathbf{W}^T \mathbf{x}) = \|\mathbf{W}^T \mathbf{x}\|^2 > 0 \quad (13)$$

It is equivalent to prove  $\mathbf{W}^T = \mathbf{Q} \mathbf{D}^{\frac{1}{2}} \mathbf{U}^T$  is invertible (i.e.,  $\mathbf{W}^T \mathbf{x} \neq 0$  when  $\mathbf{x} \neq 0$ ). We can find the inverse of  $\mathbf{W}^T$ :

$$(\mathbf{W}^T)^{-1} = \mathbf{U} \mathbf{D}^{-\frac{1}{2}} \mathbf{Q}^T \quad (14)$$

where  $\mathbf{U}$  is orthonormal,  $\mathbf{Q}$  and  $\mathbf{D}$  are acquired via eigen-decomposition of real symmetric positive definite similarity matrix  $\mathbf{S} = \mathbf{Q} \mathbf{D} \mathbf{Q}^T$ , therefore  $\mathbf{Q}$  is also orthonormal, and  $\mathbf{D}^{-\frac{1}{2}}$  is a real matrix (eigenvalues of  $\mathbf{S}$  are all positive real numbers). Since  $\mathbf{W}^T$  is invertible,  $\mathbf{W}^T \mathbf{x} \neq 0$  when  $\mathbf{x} \neq 0$ , this finish proving of Eqn. 13. Therefore, the matrix  $\mathbf{W} \mathbf{W}^T$  is guaranteed to be positive definite when  $\mathbf{S}$  is positive definite, and our HAFRAME  $\mathbf{W}$  satisfies the *frame condition* in Eqn. 1. The proof is completed.  $\square$

## References

- [1] Peter G. Casazza, Gitta Kutyniok, and Friedrich Philipp. *Introduction to Finite Frame Theory*, pages 1–53. Birkhäuser Boston, Boston, 2013. 1
- [2] J. G. F. Francis. The QR Transformation A Unitary Analogue to the LR Transformation - Part 1. *Comput. J.*, 4:265–271, 1961. 1
- [3] Roger A. Horn and Charles R. Johnson. *Matrix Analysis*. Cambridge University Press, 1990. 2
